# Supplementary material for: Identification of Regulatory Factors and Prognostic Markers in Amyotrophic Lateral Sclerosis
Source: MDPI journal article supplement (doi:10.3390/antiox11020303), 2022-02-01
Supplement: s1 [file s1]

**Supplementary Table S3.** Evaluate the prediction results of the model in sample classification.

| Classifier          | Training |           |        | Validation |           |        | All      |           |        |
|---------------------|----------|-----------|--------|------------|-----------|--------|----------|-----------|--------|
|                     | Accuracy | Precision | Recall | Accuracy   | Precision | Recall | Accuracy | Precision | Recall |
| <b>SVM</b>          | 0.996    | 0.993     | 0.997  | 0.94       | 0.916     | 0.926  | 0.982    | 0.974     | 0.979  |
| <b>Randomforest</b> | 1        | 1         | 1      | 1          | 1         | 1      | 1        | 1         | 1      |
| <b>Adaboost</b>     | 1        | 1         | 1      | 0.931      | 0.897     | 0.926  | 0.983    | 0.974     | 0.981  |

Legend: SVM, support vector machines.
