# Supplementary material for: Identification of Regulatory Factors and Prognostic Markers in Amyotrophic Lateral Sclerosis
Source: MDPI journal article supplement (doi:10.3390/antiox11020303), 2022-02-01
Supplement: s1 [file s1]

**Supplementary Table S5.** Random survival forests algorithm screen the most relevant marker for survival.

| Name    | Importance | Absolute Value | Relative Importance |
|---------|------------|----------------|---------------------|
| TPST1   | 1.09E-02   | 1.09E-02       | 1.0                 |
| ALAS2   | 8.16E-03   | 8.16E-03       | 0.7                 |
| IFNGR2  | 6.97E-03   | 6.97E-03       | 0.6                 |
| MAEA    | 6.68E-03   | 6.68E-03       | 0.6                 |
| TMEM71  | 3.59E-03   | 3.59E-03       | 0.3                 |
| VNN2    | 2.90E-03   | 2.90E-03       | 0.3                 |
| FGL2    | -2.39E-03  | 2.39E-03       | 0.2                 |
| RGS2    | -2.25E-03  | 2.25E-03       | 0.2                 |
| USP32   | 2.04E-03   | 2.04E-03       | 0.2                 |
| FOS     | 1.76E-03   | 1.76E-03       | 0.2                 |
| GLIPR1  | 1.45E-03   | 1.45E-03       | 0.1                 |
| D2HGDH  | -1.00E-03  | 1.00E-03       | 0.1                 |
| ABCA1   | 4.55E-04   | 4.55E-04       | 0.0                 |
| TLE4    | 4.15E-04   | 4.15E-04       | 0.0                 |
| CASP4   | 3.08E-04   | 3.08E-04       | 0.0                 |
| SRPK1   | -2.80E-04  | 2.80E-04       | 0.0                 |
| SLC31A2 | 5.99E-05   | 5.99E-05       | 0.0                 |
| March1  | 5.15E-05   | 5.15E-05       | 0.0                 |
