# Supplementary material for: Identification of Regulatory Factors and Prognostic Markers in Amyotrophic Lateral Sclerosis
Source: MDPI journal article supplement (doi:10.3390/antiox11020303), 2022-02-01
Supplement: s1 [file s1]

**Supplementary Table S1.** mRNA microarray and sequencing in patients with ALS.

| GEO ID       | Sample type                        | Platform                 | Sample Size | Molecular type |
|--------------|------------------------------------|--------------------------|-------------|----------------|
| GSE26927     | Snap-frozen brain blocks           | Illumina humanRef-8 v2.0 | 20          | mRNA           |
| GSE76220     | Motor neuron of lumbar spinal cord | Sequencing               | 80          | mRNA           |
| GSE67196     | Frontal Cortex<br>Cerebellum       | Sequencing               | 19<br>18    | mRNA           |
| E-MTAB-2325  | Motor cortex                       | Agilent 4*44k            | 41          | mRNA           |
| GSE112681    | Whole blood                        | Illumina HT              | 1117        | mRNA           |
| E-GEOD-28253 | Lymphocytes                        | Agilent 4*44k            | 22          | mRNA           |

Legend: ALS, Amyotrophic Lateral Sclerosis; GEO, Gene Expression Omnibus; ID, Identity Document.
