# Supplementary material for: Identification of Regulatory Factors and Prognostic Markers in Amyotrophic Lateral Sclerosis
Source: MDPI journal article supplement (doi:10.3390/antiox11020303), 2022-02-01
Supplement: s1 [file s1]

**Supplementary Table S4.** Survival related markers screened by univariate Cox proportional hazards regression.

|         | Coef  | HR(95 CI for HR) | p.value | FDR      |
|---------|-------|------------------|---------|----------|
| ABCA1   | 0.25  | 1.3 (1-1.6)      | 0.02    | 0.121538 |
| TMEM71  | 0.26  | 1.3 (1-1.6)      | 0.028   | 0.13825  |
| VNN2    | 0.33  | 1.4 (1.1-1.8)    | 0.0082  | 0.080975 |
| RGS2    | 0.18  | 1.2 (1-1.4)      | 0.027   | 0.13825  |
| SRPK1   | 0.32  | 1.4 (1.1-1.8)    | 0.018   | 0.121538 |
| USP32   | 0.27  | 1.3 (1-1.7)      | 0.025   | 0.13825  |
| March1  | 0.36  | 1.4 (1.1-1.8)    | 0.0038  | 0.077683 |
| TPST1   | 0.33  | 1.4 (1.1-1.8)    | 0.0058  | 0.077683 |
| SLC31A2 | 0.35  | 1.4 (1.1-1.9)    | 0.012   | 0.0948   |
| TLE4    | 0.33  | 1.4 (1.1-1.8)    | 0.0069  | 0.077871 |
| FOS     | 0.28  | 1.3 (1.1-1.7)    | 0.012   | 0.0948   |
| FGL2    | 0.28  | 1.3 (1-1.8)      | 0.049   | 0.215056 |
| MAEA    | 0.39  | 1.5 (1.1-2)      | 0.019   | 0.121538 |
| GLIPR1  | 0.45  | 1.6 (1.1-2.1)    | 0.0059  | 0.077683 |
| IFNGR2  | 0.59  | 1.8 (1.3-2.5)    | 0.00044 | 0.03476  |
| CASP4   | 0.37  | 1.4 (1-2)        | 0.03    | 0.139412 |
| D2HGDH  | -0.42 | 0.66 (0.49-0.87) | 0.004   | 0.077683 |
| ALAS2   | -0.18 | 0.83 (0.74-0.94) | 0.0033  | 0.077683 |

Legend: Coef, coefficient; HR, hazard ratio; CI, confidence interval; FDR, False Discovery Rate.
